# Supplementary material
Source: Springer Nature journal article supplement (https://www.springermedizin.de/resource/supplementary/12958_2014_1216_MOESM5_ESM.pdf/9567048)

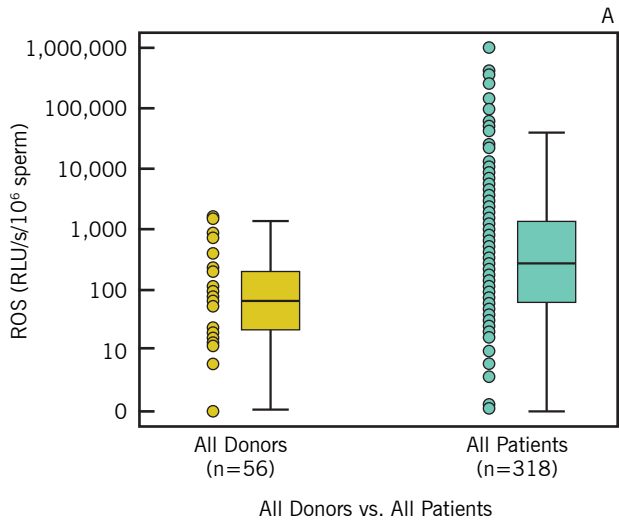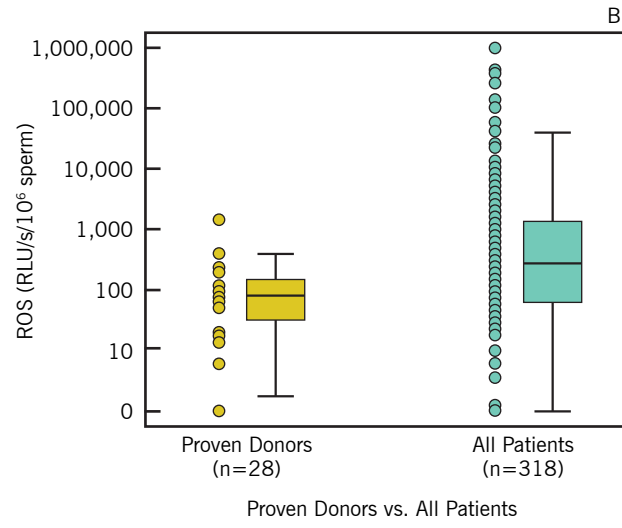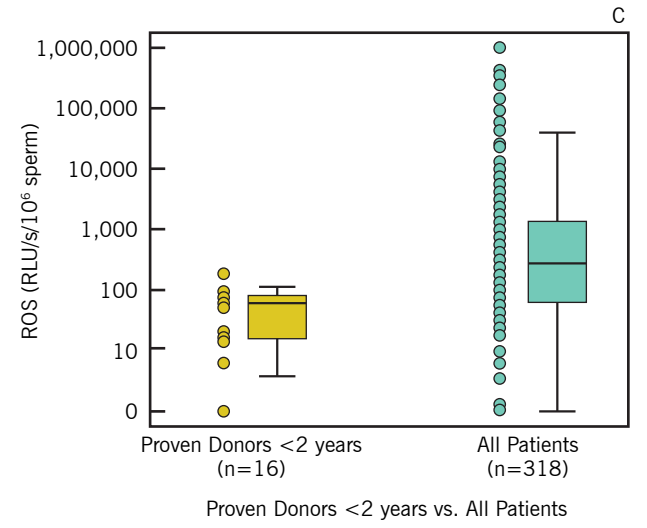

Supplement: MOESM5 [file 9567048]
